# Supplementary material for: An Approach to Evaluating Competence in Assessing and Managing Violence Risk
Source: Atypon-hosted journal article supplement (doi:10.1176/ps.62.1.pss6201_0090), 2011-01-01
Supplement: McNeil+DS.pdf [file McNeil+DS.pdf]

## COMPETENCY ASSESSMENT INSTRUMENT FOR VIOLENCE RISK

Trainee Name: \_\_\_\_\_ Date \_\_\_\_\_

Trainee Background:  PGY1    PGY2    PGY3    PGY4    Fellow    Medical Student    Psychology Fellow

Rater Name: \_\_\_\_\_ Rater Role:  Observer    Standardized Patient

Difficulty of Interview:  Low   patient is cooperative, well organized, and cognitively intact  
 Moderate   patient is abrupt, uncertain, or cognitively compromised  
 High   patient is hostile, disorganized, or cognitively impaired

| 1 Task Not Done<br><small>Task not completed</small>                             | 2 Working Towards Competency<br><small>Task done but needs improvement<br/>Some deficiencies</small> | 3 Competent<br><small>Adequate<br/>Ready for independent practice</small> | 4 Advanced<br><small>Exceptional<br/>Up to the most current techniques</small> |
|----------------------------------------------------------------------------------|------------------------------------------------------------------------------------------------------|---------------------------------------------------------------------------|--------------------------------------------------------------------------------|
| <b>INTERVIEWING AND DATA COLLECTION:<br/>A. SOURCES OF INFORMATION (PROCESS)</b> |                                                                                                      | <b>APPROACHING COMPETENCY</b>                                             | <b>ACHIEVED COMPETENCY</b>                                                     |

|                                                                                                              |                            |                            |                            |                            |
|--------------------------------------------------------------------------------------------------------------|----------------------------|----------------------------|----------------------------|----------------------------|
| 1. Develops <i>rapport</i> with patient                                                                      | <input type="checkbox"/> 1 | <input type="checkbox"/> 2 | <input type="checkbox"/> 3 | <input type="checkbox"/> 4 |
| 2. Obtains a <i>history</i> relevant to risk of violence                                                     | <input type="checkbox"/> 1 | <input type="checkbox"/> 2 | <input type="checkbox"/> 3 | <input type="checkbox"/> 4 |
| 3. Considers findings from the <i>mental status examination</i> that pertain to risk of violence             | <input type="checkbox"/> 1 | <input type="checkbox"/> 2 | <input type="checkbox"/> 3 | <input type="checkbox"/> 4 |
| 4. Considers review of <i>records</i> (e.g., medical chart)                                                  | <input type="checkbox"/> 1 | <input type="checkbox"/> 2 | <input type="checkbox"/> 3 | <input type="checkbox"/> 4 |
| 5. Considers obtaining collateral information from <i>other professionals</i> (e.g., therapists, physicians) | <input type="checkbox"/> 1 | <input type="checkbox"/> 2 | <input type="checkbox"/> 3 | <input type="checkbox"/> 4 |
| 6. Considers obtaining collateral information from <i>family/significant others</i>                          | <input type="checkbox"/> 1 | <input type="checkbox"/> 2 | <input type="checkbox"/> 3 | <input type="checkbox"/> 4 |

|                                                                                |  |                               |                            |
|--------------------------------------------------------------------------------|--|-------------------------------|----------------------------|
| <b>INTERVIEWING AND DATA COLLECTION:<br/>B. TYPES OF INFORMATION (CONTENT)</b> |  | <b>APPROACHING COMPETENCY</b> | <b>ACHIEVED COMPETENCY</b> |
|--------------------------------------------------------------------------------|--|-------------------------------|----------------------------|

|                                                                                                                  |                            |                            |                            |                            |
|------------------------------------------------------------------------------------------------------------------|----------------------------|----------------------------|----------------------------|----------------------------|
| 1. Considers current <i>violent ideation</i> , intent, and/or plan                                               | <input type="checkbox"/> 1 | <input type="checkbox"/> 2 | <input type="checkbox"/> 3 | <input type="checkbox"/> 4 |
| 2. Identifies <i>any</i> risk factors for violence                                                               | <input type="checkbox"/> 1 | <input type="checkbox"/> 2 | <input type="checkbox"/> 3 | <input type="checkbox"/> 4 |
| 3. Evaluates <i>past</i> (historical) risk factors for violence (e.g., history of assaults)                      | <input type="checkbox"/> 1 | <input type="checkbox"/> 2 | <input type="checkbox"/> 3 | <input type="checkbox"/> 4 |
| 4. Evaluates <i>present</i> (clinical) risk factors for violence (e.g., active symptoms of major mental illness) | <input type="checkbox"/> 1 | <input type="checkbox"/> 2 | <input type="checkbox"/> 3 | <input type="checkbox"/> 4 |
| 5. Evaluates <i>future</i> (risk management, situational) risk factors for violence (e.g., stress)               | <input type="checkbox"/> 1 | <input type="checkbox"/> 2 | <input type="checkbox"/> 3 | <input type="checkbox"/> 4 |
| 6. Considers <i>protective factors</i> against risk of violence (e.g., social support, therapeutic alliance)     | <input type="checkbox"/> 1 | <input type="checkbox"/> 2 | <input type="checkbox"/> 3 | <input type="checkbox"/> 4 |

|                                           |  |                               |                            |
|-------------------------------------------|--|-------------------------------|----------------------------|
| <b>CASE FORMULATION AND PRESENTATION:</b> |  | <b>APPROACHING COMPETENCY</b> | <b>ACHIEVED COMPETENCY</b> |
|-------------------------------------------|--|-------------------------------|----------------------------|

|                                                                                            |                            |                            |                            |                            |
|--------------------------------------------------------------------------------------------|----------------------------|----------------------------|----------------------------|----------------------------|
| 1. <i>Estimates</i> the risk of violence (e.g., low, moderate, high)                       | <input type="checkbox"/> 1 | <input type="checkbox"/> 2 | <input type="checkbox"/> 3 | <input type="checkbox"/> 4 |
| 2. Explains <i>thought process</i> or rationale for decision making about risk of violence | <input type="checkbox"/> 1 | <input type="checkbox"/> 2 | <input type="checkbox"/> 3 | <input type="checkbox"/> 4 |

|                                                                                                                     |                                       |                                       |                                       |                                       |
|---------------------------------------------------------------------------------------------------------------------|---------------------------------------|---------------------------------------|---------------------------------------|---------------------------------------|
| 3. <i>Communicates</i> the estimate of violence risk clearly and objectively                                        | <input type="checkbox"/> <sub>1</sub> | <input type="checkbox"/> <sub>2</sub> | <input type="checkbox"/> <sub>3</sub> | <input type="checkbox"/> <sub>4</sub> |
| 4. Specifies the <i>time frame</i> to which risk estimate applies (e.g., imminent vs. long term, acute vs. chronic) | <input type="checkbox"/> <sub>1</sub> | <input type="checkbox"/> <sub>2</sub> | <input type="checkbox"/> <sub>3</sub> | <input type="checkbox"/> <sub>4</sub> |
| 5. Gives an <i>organized and accurate</i> presentation of the findings                                              | <input type="checkbox"/> <sub>1</sub> | <input type="checkbox"/> <sub>2</sub> | <input type="checkbox"/> <sub>3</sub> | <input type="checkbox"/> <sub>4</sub> |
| 6. Relies on risk factors for violence that are supported by <i>scientific research</i>                             | <input type="checkbox"/> <sub>1</sub> | <input type="checkbox"/> <sub>2</sub> | <input type="checkbox"/> <sub>3</sub> | <input type="checkbox"/> <sub>4</sub> |

| <b>TREATMENT PLANNING:</b>                                                                                                               | <b>APPROACHING COMPETENCY</b>         |                                       | <b>ACHIEVED COMPETENCY</b>            |                                       |
|------------------------------------------------------------------------------------------------------------------------------------------|---------------------------------------|---------------------------------------|---------------------------------------|---------------------------------------|
| 1. Addresses the <i>risk of violence</i>                                                                                                 | <input type="checkbox"/> <sub>1</sub> | <input type="checkbox"/> <sub>2</sub> | <input type="checkbox"/> <sub>3</sub> | <input type="checkbox"/> <sub>4</sub> |
| 2. Describes an <i>intervention plan</i> that would effectively minimize the risk of violence                                            | <input type="checkbox"/> <sub>1</sub> | <input type="checkbox"/> <sub>2</sub> | <input type="checkbox"/> <sub>3</sub> | <input type="checkbox"/> <sub>4</sub> |
| 3. Addresses <i>modifiable risk factors</i> for violence                                                                                 | <input type="checkbox"/> <sub>1</sub> | <input type="checkbox"/> <sub>2</sub> | <input type="checkbox"/> <sub>3</sub> | <input type="checkbox"/> <sub>4</sub> |
| 4. Includes a <i>risk/benefit analysis</i> , i.e., pros and cons of proposed intervention and alternatives for managing risk of violence | <input type="checkbox"/> <sub>1</sub> | <input type="checkbox"/> <sub>2</sub> | <input type="checkbox"/> <sub>3</sub> | <input type="checkbox"/> <sub>4</sub> |
| 5. Considers <i>hospitalization</i> to reduce risk of violence                                                                           | <input type="checkbox"/> <sub>1</sub> | <input type="checkbox"/> <sub>2</sub> | <input type="checkbox"/> <sub>3</sub> | <input type="checkbox"/> <sub>4</sub> |
| 6. Considers <i>involuntary civil commitment</i> for danger to others                                                                    | <input type="checkbox"/> <sub>1</sub> | <input type="checkbox"/> <sub>2</sub> | <input type="checkbox"/> <sub>3</sub> | <input type="checkbox"/> <sub>4</sub> |
| 7. Demonstrates <i>understanding</i> of local <i>civil commitment statutes</i> regarding danger to others                                | <input type="checkbox"/> <sub>1</sub> | <input type="checkbox"/> <sub>2</sub> | <input type="checkbox"/> <sub>3</sub> | <input type="checkbox"/> <sub>4</sub> |
| 8. Considers involving <i>family/significant others</i>                                                                                  | <input type="checkbox"/> <sub>1</sub> | <input type="checkbox"/> <sub>2</sub> | <input type="checkbox"/> <sub>3</sub> | <input type="checkbox"/> <sub>4</sub> |
| 9. Considers use of psychoactive <i>medication</i>                                                                                       | <input type="checkbox"/> <sub>1</sub> | <input type="checkbox"/> <sub>2</sub> | <input type="checkbox"/> <sub>3</sub> | <input type="checkbox"/> <sub>4</sub> |
| 10. Considers increasing the intensity of <i>psychosocial treatment</i>                                                                  | <input type="checkbox"/> <sub>1</sub> | <input type="checkbox"/> <sub>2</sub> | <input type="checkbox"/> <sub>3</sub> | <input type="checkbox"/> <sub>4</sub> |
| 11. Considers <i>duty to protect</i> (e.g., Tarasoff warning)                                                                            | <input type="checkbox"/> <sub>1</sub> | <input type="checkbox"/> <sub>2</sub> | <input type="checkbox"/> <sub>3</sub> | <input type="checkbox"/> <sub>4</sub> |
| 12. Considers obtaining <i>consultation</i>                                                                                              | <input type="checkbox"/> <sub>1</sub> | <input type="checkbox"/> <sub>2</sub> | <input type="checkbox"/> <sub>3</sub> | <input type="checkbox"/> <sub>4</sub> |

| <b>DOCUMENTATION:</b>                                    | <b>APPROACHING COMPETENCY</b>         |                                       | <b>ACHIEVED COMPETENCY</b>            |                                       |
|----------------------------------------------------------|---------------------------------------|---------------------------------------|---------------------------------------|---------------------------------------|
| Expresses risk assessment for violence <i>in writing</i> | <input type="checkbox"/> <sub>1</sub> | <input type="checkbox"/> <sub>2</sub> | <input type="checkbox"/> <sub>3</sub> | <input type="checkbox"/> <sub>4</sub> |

|                                                                                         |                                                                                                          |                                                                      |                                                                           |
|-----------------------------------------------------------------------------------------|----------------------------------------------------------------------------------------------------------|----------------------------------------------------------------------|---------------------------------------------------------------------------|
| <b>1 – 2 Unacceptable</b><br>Several tasks not completed<br>Some important deficiencies | <b>3 – 4 Working Towards Competency</b><br>Several tasks done but needs improvement<br>Some deficiencies | <b>5 - 6 Competent</b><br>Adequate<br>Ready for independent practice | <b>7 – 8 Advanced</b><br>Exceptional<br>Up to the most current techniques |
|-----------------------------------------------------------------------------------------|----------------------------------------------------------------------------------------------------------|----------------------------------------------------------------------|---------------------------------------------------------------------------|

| <b>OVERALL RATING:</b>                                 | <b>APPROACHING COMPETENCY</b>         |                                       |                                       |                                       | <b>ACHIEVED COMPETENCY</b>            |                                       |                                       |                                       |
|--------------------------------------------------------|---------------------------------------|---------------------------------------|---------------------------------------|---------------------------------------|---------------------------------------|---------------------------------------|---------------------------------------|---------------------------------------|
| <i>Overall quality</i> of risk assessment for violence | <input type="checkbox"/> <sub>1</sub> | <input type="checkbox"/> <sub>2</sub> | <input type="checkbox"/> <sub>3</sub> | <input type="checkbox"/> <sub>4</sub> | <input type="checkbox"/> <sub>5</sub> | <input type="checkbox"/> <sub>6</sub> | <input type="checkbox"/> <sub>7</sub> | <input type="checkbox"/> <sub>8</sub> |

|                  |
|------------------|
| <b>COMMENTS:</b> |
|------------------|
